# Supplementary material for: A binary all-nanoporous composite membrane constructed via vapor phase transformation for high-permeance gas separation
Source: Royal Society of Chemistry journal article supplement (doi:10.1039/d1qi00847a), 2021-01-01
Supplement: d1qi00847a1.pdf [file d1qi00847a1.pdf]

## Supplementary Information

### Binary All-Nanoporous Composite Membrane Constructed via Vapor Phase Transformation for High-Permeance Gas Separation

Mengqi Bu, ‡<sup>a</sup> Yang Feng, ‡<sup>a</sup> Qingxun Li, <sup>d</sup> Yiran Wang, <sup>d</sup> Shou Feng, <sup>a</sup> Kai Zhang, <sup>a</sup> Yujie Jiang, <sup>a</sup> Lili Fan, <sup>b</sup> Zixi Kang <sup>\*, b, c</sup> and Daofeng Sun <sup>\*, b</sup>

<sup>a</sup>*College of Science, China University of Petroleum (East China), Qingdao, Shandong, 266580, PR China.*

<sup>b</sup>*School of Materials Science and Engineering, China University of Petroleum (East China), Qingdao, Shandong, 266580, PR China.*

<sup>c</sup>*State Key Laboratory of Structural Chemistry, Fujian Institute of Research on the Structure of Matter, Chinese Academy of Sciences, Fuzhou, Fujian 350002, PR China.*

<sup>d</sup>*Petrochemical Research Institute, China National Petroleum Corporation (CNPC), Beijing, 100083, PR China.*

‡ These authors equally contributed to this work.

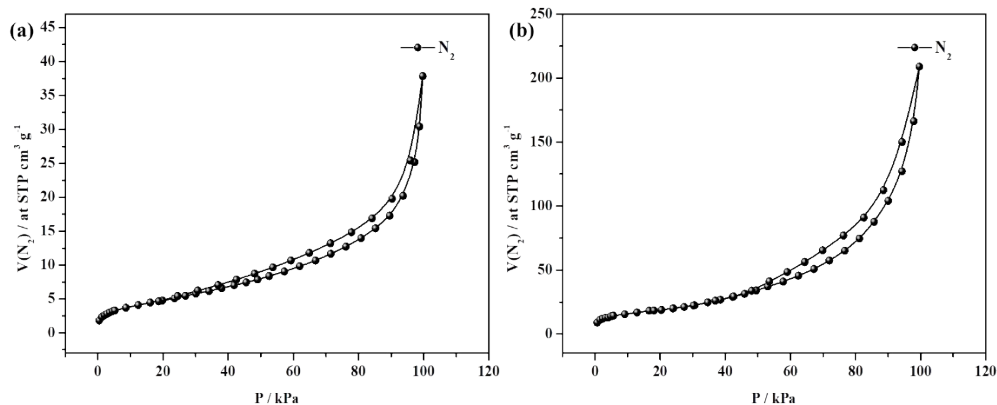

**Fig. S1**  $N_2$  adsorption-desorption isotherms of **ZIF-9** (a) and **COF-TpPa-1** (b) at 77 K.

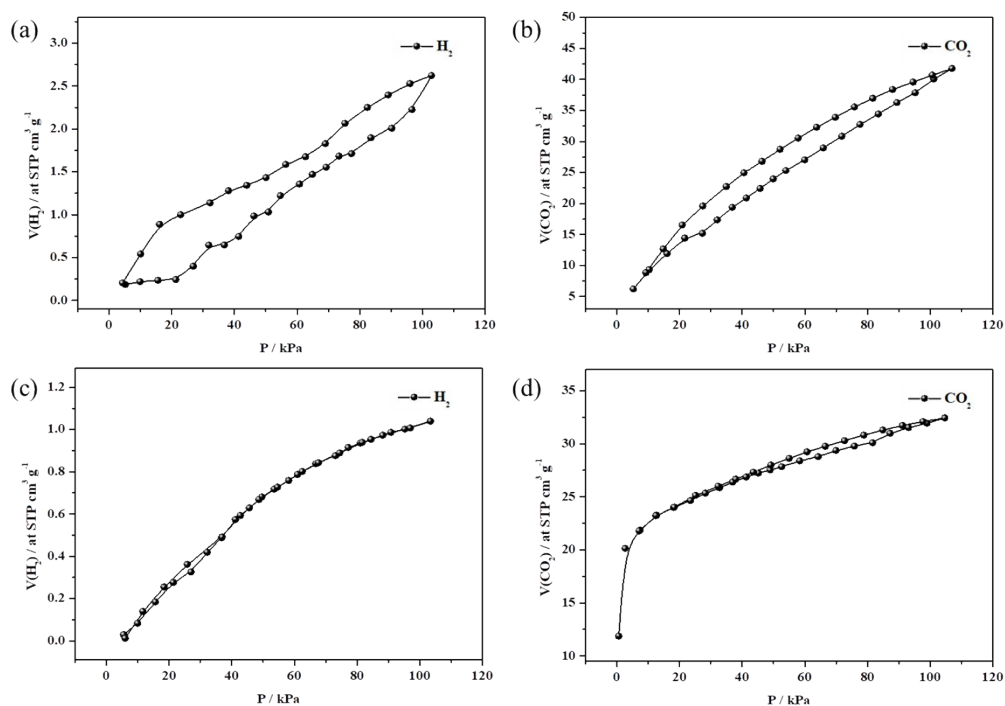

**Fig. S2**  $H_2$  adsorption-desorption isotherms of **COF-TpPa-1** (a) and **ZIF-9** (c) at 298 K;  $CO_2$  adsorption/desorption isotherms of **COF-TpPa-1** (b) and **ZIF-9** (d) at 298 K.

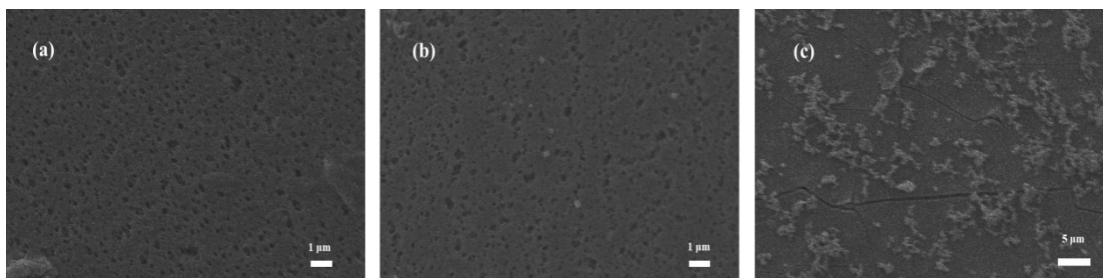

**Fig. S3** Top-view images of Co gel (a), COF-TpPa-1/Co gel (b) and COF-TpPa-1 layer (c).

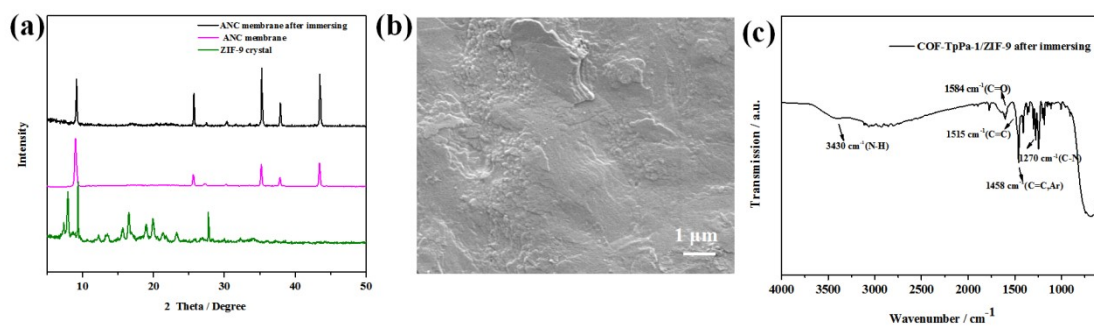

**Fig. S4** PXRD pattern (a), SEM image (b) and FTIR (c) of the COF-TpPa-1/ZIF-9 ANC membranes after water treatments.

**Table S1** Single gas permeance for  $\alpha$ -Al<sub>2</sub>O<sub>3</sub> substrate, COF-TpPa-1 and Co gel layer at 25 °C.

| membrane                                           | H <sub>2</sub> permeance (GPU) | CO <sub>2</sub> permeance (GPU) | H <sub>2</sub> /CO <sub>2</sub> selectivity |
|----------------------------------------------------|--------------------------------|---------------------------------|---------------------------------------------|
| $\alpha$ -Al <sub>2</sub> O <sub>3</sub> substrate | 5600.06±29.47                  | 4568.50±29.50                   | 1.23±0.005                                  |
| COF-TpPa-1                                         | 5747.45±58.95                  | 4981.14±83.36                   | 1.15±0.003                                  |
| Co gel                                             | 12.90±0.33                     | 5.07±0.91                       | 2.58±0.40                                   |

**Table S2** Single gas permeance for **ZIF-9** and **COF-TpPa-1/ZIF-9** ANC membranes at 25 °C under the pressure of 1.6 bar.

| membrane             | H <sub>2</sub> permeance<br>(GPU) | CO <sub>2</sub> permeance<br>(GPU) | N <sub>2</sub> permeance<br>(GPU) | CH <sub>4</sub> permeance<br>(GPU) |
|----------------------|-----------------------------------|------------------------------------|-----------------------------------|------------------------------------|
| ZIF-9                | 22.36±4.99                        | 1.56±0.74                          | 2.35±0.61                         | 3.39±0.71                          |
| COF-TpPa-1/ZIF-9 ANC | 551.16±25.02                      | 72.06±6.46                         | 79.29±10.84                       | 150.91±7.92                        |

**Table S3** Single gas permeation properties of the **ZIF-9** membrane at 25°C and different trans-membrane pressure drops.

| ZIF-9 membrane                     | 1.2 bar    | 1.4 bar    | 1.6 bar    | 1.8 bar    |
|------------------------------------|------------|------------|------------|------------|
| H <sub>2</sub> permeance<br>(GPU)  | 23.67±4.67 | 21.88±4.07 | 22.36±4.99 | 26.32±6.38 |
| CO <sub>2</sub> permeance<br>(GPU) | 1.56±0.67  | 1.42±0.60  | 1.56±0.74  | 1.79±0.84  |

**Table S4** Single gas permeation properties of the **COF-TpPa-1/ZIF-9** ANC membrane at 25°C and different trans-membrane pressure drops.

| COF-TpPa-1/ZIF-9<br>ANC membrane   | 1.2 bar        | 1.4 bar        | 1.6 bar        | 1.8 bar        |
|------------------------------------|----------------|----------------|----------------|----------------|
| H <sub>2</sub> permeance<br>(GPU)  | 564.43 ± 31.26 | 529.06 ± 27.09 | 551.16 ± 25.02 | 571.80 ± 25.01 |
| CO <sub>2</sub> permeance<br>(GPU) | 77.51 ± 1.67   | 72.06 ± 1.88   | 72.06 ± 6.46   | 76.04 ± 4.59   |

**Table S5** Single gas permeation properties of the **COF-TpPa-1/ZIF-9** ANC membrane at 25°C, 0.2 bar and low humidity conditions.

| membrane             | H <sub>2</sub> permeance<br>(GPU) | CO <sub>2</sub> permeance<br>(GPU) | H <sub>2</sub> /CO <sub>2</sub> selectivity |
|----------------------|-----------------------------------|------------------------------------|---------------------------------------------|
| COF-TpPa-1/ZIF-9 ANC | 453.7 ± 15.39                     | 64.14 ± 8.03                       | 7.08 ± 0.45                                 |
